# Supplementary material
Source: PubMed Central journal article supplement (PMC10066981)
Supplement: 40261_2023_1254_MOESM1_ESM.pdf [file 40261_2023_1254_MOESM1_ESM.pdf]

## Supplementary Material

### *Clinical Drug Investigation*

---

# SPENDING, UTILIZATION, AND PRICE TRENDS FOR IMMUNE CHECKPOINT INHIBITORS IN U.S. MEDICAID PROGRAMS: AN EMPIRICAL ANALYSIS FROM 2011 TO 2021

---

Young Eun Shin, PharmD, MS<sup>1</sup>; Arun Kumar, PharmD, MS, PhD<sup>1</sup>; Jeff Jianfei Guo, PhD<sup>1</sup>

<sup>1</sup>Division of Pharmacy Practice and Administrative Sciences, James L. Winkle College of Pharmacy,  
University of Cincinnati, 3225 Eden Ave, Cincinnati, OH 45267-0004

**Running Heading:** Spending and Utilization Trends for ICIs in Medicaid

#### **Corresponding author**

Young Eun Shin, PharmD, MS

[shinyh@mail.uc.edu](mailto:shinyh@mail.uc.edu)

ORCID: 0000-0003-3050-0252

**Table S1. Approval dates for ICI selected indications [1].**

| Approval Year     | Drug Name              | Status     | Indications                                                                                                                 |
|-------------------|------------------------|------------|-----------------------------------------------------------------------------------------------------------------------------|
| 2011 <sup>a</sup> | Ipilimumab             | Approval   | Advanced melanoma                                                                                                           |
| 2014 <sup>b</sup> | Pembrolizumab          | Approval   | Advanced melanoma                                                                                                           |
| 2014 <sup>c</sup> | Nivolumab              | Approval   | Advanced melanoma                                                                                                           |
| 2015              | Nivolumab + Ipilimumab | Approval   | BRAF V600 Wild-type melanoma                                                                                                |
| 2015              | Pembrolizumab          | Approval   | Advanced non-small cell lung cancer                                                                                         |
| 2015              | Ipilimumab             | Approval   | Reduce risk of melanoma returning after surgery                                                                             |
| 2015              | Pembrolizumab          | Approval   | Advanced melanoma                                                                                                           |
| 2016              | Nivolumab + Ipilimumab | Approval   | Unresectable or metastatic melanoma across BRAF status                                                                      |
| 2016 <sup>d</sup> | Atezolizumab           | Approval   | Urothelial carcinoma                                                                                                        |
| 2016              | Pembrolizumab          | Approval   | Recurrent or metastatic head and neck                                                                                       |
| 2016              | Atezolizumab           | Approval   | Metastatic non-small cell lung cancer                                                                                       |
| 2016              | Pembrolizumab          | Approval   | Metastatic non-small cell lung cancer                                                                                       |
| 2017              | Ipilimumab             | Approval   | Unresectable or metastatic melanoma                                                                                         |
| 2017 <sup>e</sup> | Avelumab               | Approval   | Metastatic Merkel cell carcinoma                                                                                            |
| 2018 <sup>f</sup> | Cemiplimab             | Approval   | Advanced cutaneous squamous cell carcinoma                                                                                  |
| 2020              | Nivolumab              | Withdrawal | Advanced or metastatic small cell lung cancer (SCLC) <sup>g</sup>                                                           |
| 2021              | Pembrolizumab          | Withdrawal | Metastatic small cell lung cancer <sup>g</sup>                                                                              |
| 2021              | Pembrolizumab          | Withdrawal | Recurrent locally advanced or metastatic gastric or gastroesophageal adenocarcinoma whose tumors express PD-L1 <sup>g</sup> |
| 2021              | Nivolumab              | Withdrawal | Hepatocellular carcinoma previously treated with sorafenib <sup>g</sup>                                                     |

<sup>a</sup> Ipilimumab initial approval, <sup>b</sup> Pembrolizumab initial approval, <sup>c</sup> Nivolumab initial approval, <sup>d</sup> Atezolizumab initial approval, <sup>e</sup> Avelumab initial approval, <sup>f</sup> Cemiplimab initial approval, <sup>g</sup> Withdrawal from U.S. market

## References

1. Drugs@FDA: FDA-Approved Drugs: U.S. Food & Drug Administration; [Available from: <https://www.accessdata.fda.gov/scripts/cder/daf/>].
